# Supplementary material for: Langerin is a natural barrier to HIV-1 transmission by Langerhans cells
Source: Springer Nature journal article supplement (doi:10.1038/nm1541), 2007-03-01
Supplement: 41591_2007_BFnm1541_MOESM11_ESM.pdf [file 41591_2007_BFnm1541_MOESM11_ESM.pdf]

Supplementary Figure 4. de Witte et al.

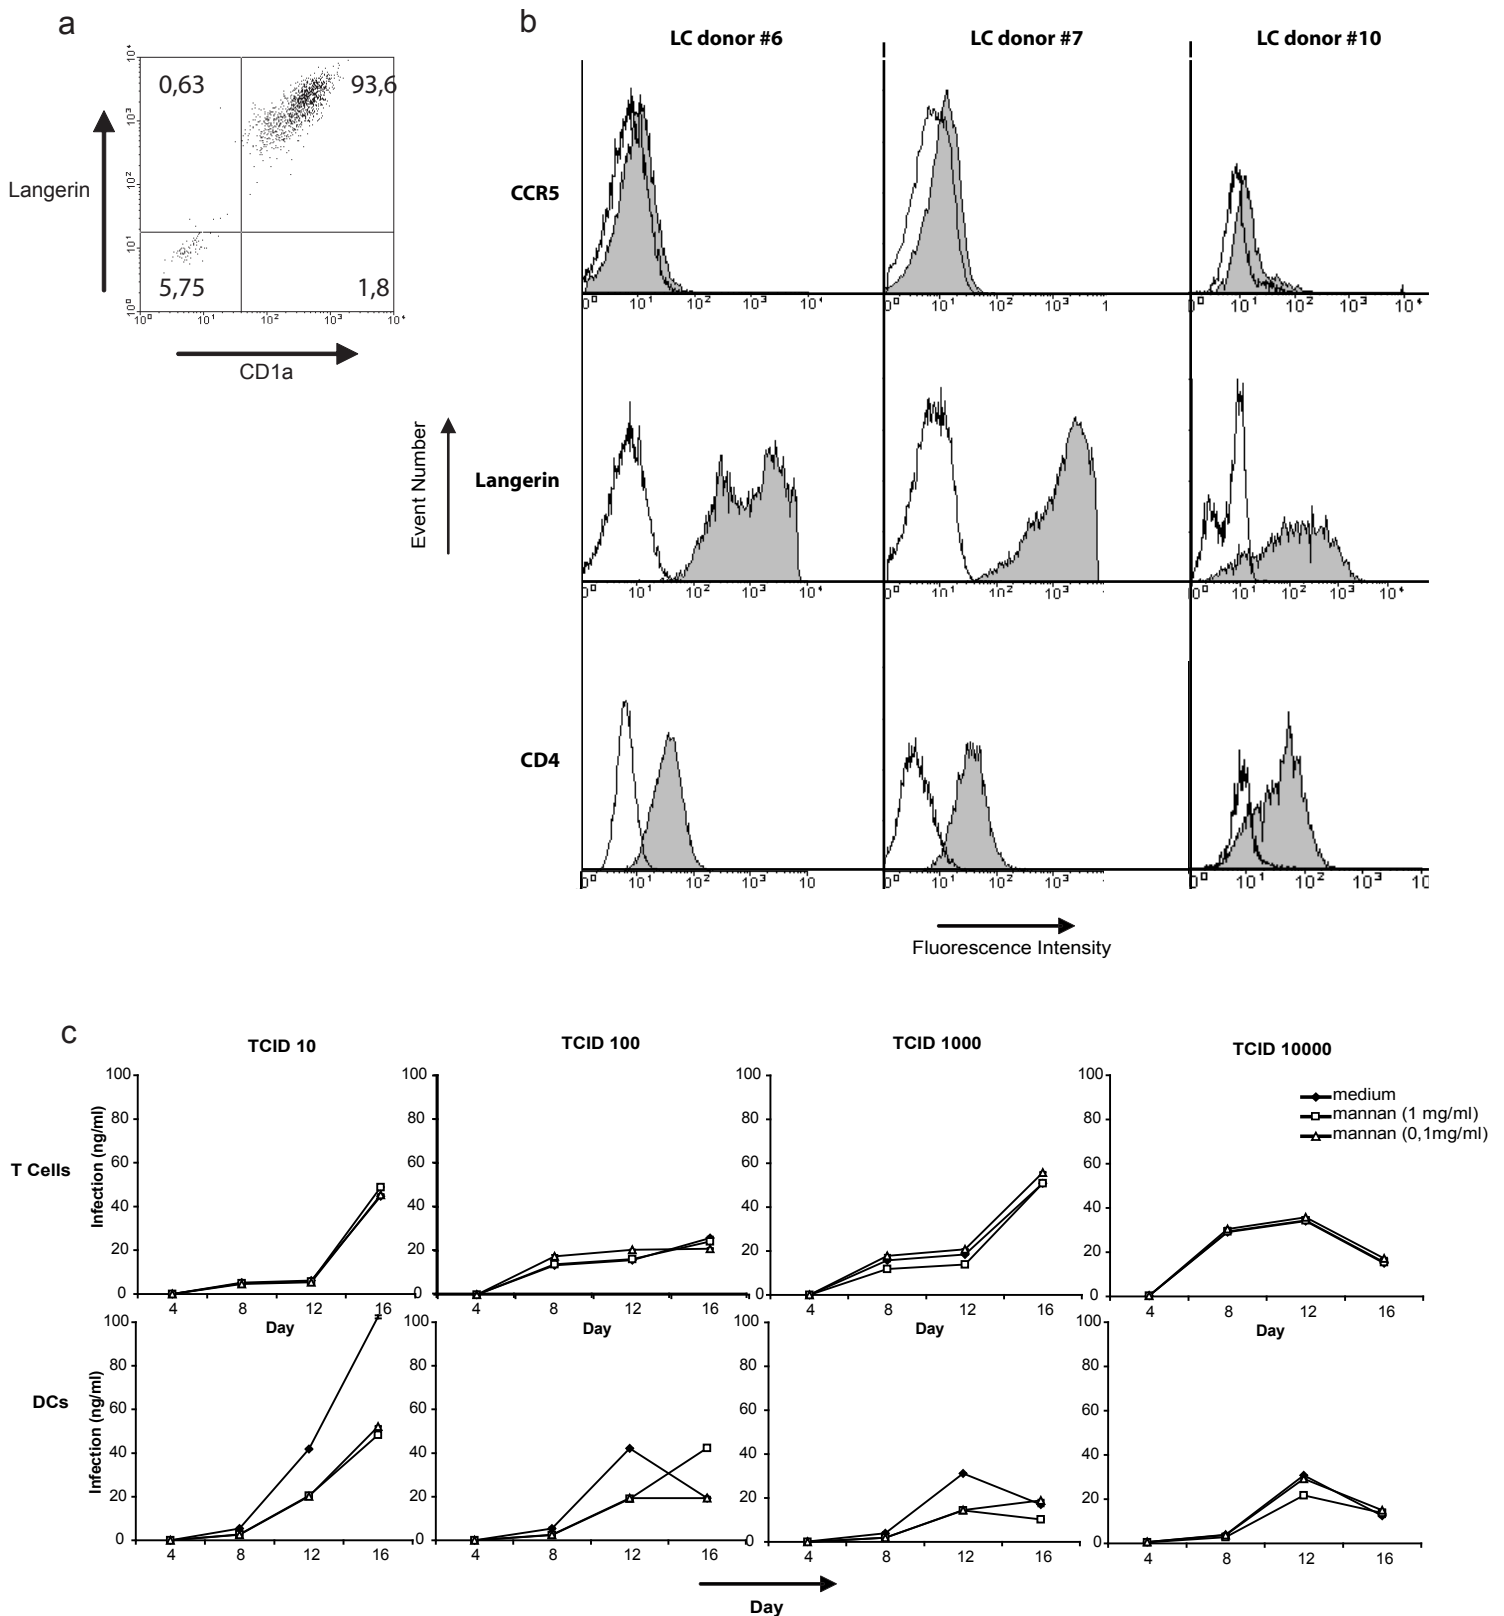

**Supplementary Figure 4. Primary emigrant LCs resemble immature isolated LCs. a,b.** Primary emigrated LCs isolated without enzymatic treatment were stained for LC marker CD1a, HIV-1 (co)-receptors CD4, CCR5 and Langerin. Unfilled histograms represent isotype-control and filled histogram specific antibody staining. The percentages are depicted in the quadrants of the dotplot. **c.** moDCs (50.000) were pulsed with HIV-1JR-CSF (TCID 100-moi 0.02 (0,21 ng p24) unless depicted otherwise) and after washing away unbound virus, activated CD4+ T cells were added. Cells were pre-incubated with medium, mannan (1mg/ml or 0.1 mg/ml) for 30 minutes before addition of the virus. Viral replication was determined by the HIV-1 p24-capsid ELISA in supernatant. To control the infection of the transmission assay in **Fig. 3c**, activated CD4+ T cells used in **Fig. 3c** were infected with different concentrations of HIV-1JR-CSF and supernatant was collected of different days.
