# Supplementary material for: Langerin is a natural barrier to HIV-1 transmission by Langerhans cells
Source: Springer Nature journal article supplement (doi:10.1038/nm1541), 2007-03-01
Supplement: 41591_2007_BFnm1541_MOESM13_ESM.pdf [file 41591_2007_BFnm1541_MOESM13_ESM.pdf]

Supplementary Figure 6. de Witte et al.

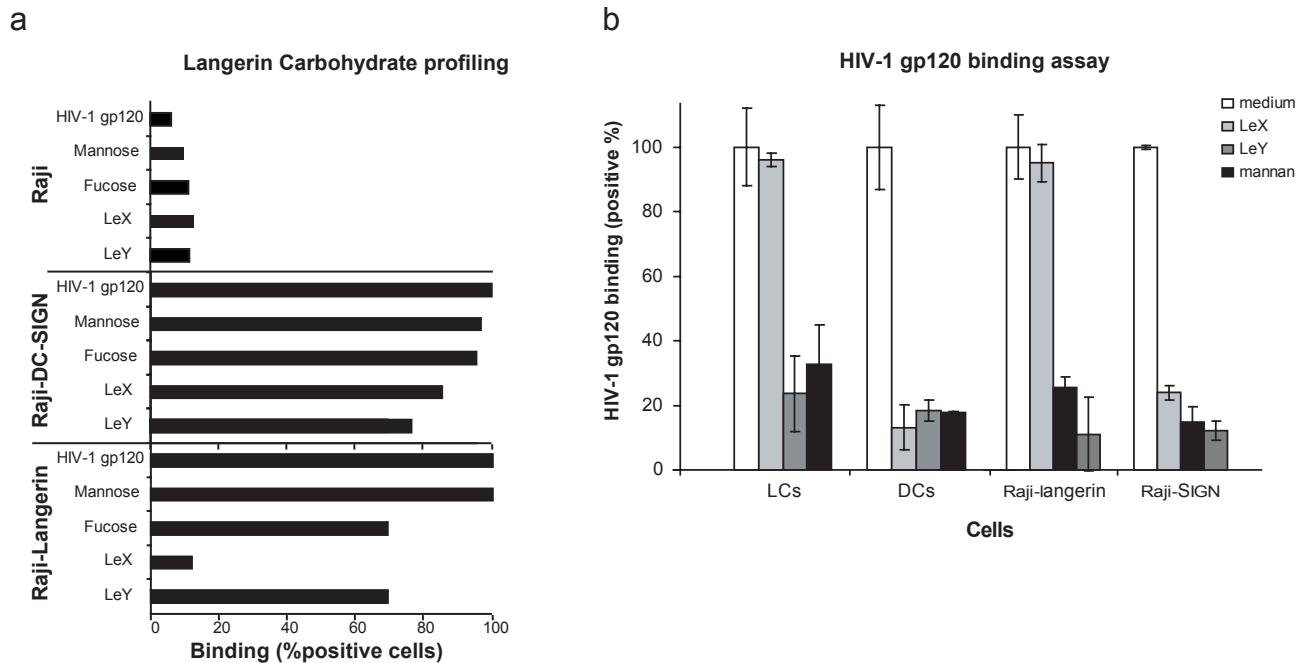

**Supplementary Figure 6. Lewis X is a potential microbicide that blocks HIV-1 gp120 binding to DC-SIGN, but not Langerin.** a. The carbohydrate-binding specificities of Langerin and DC-SIGN are distinguished by Lewis X. Parental Raji cells, Raji cells expressing DC-SIGN or Langerin were incubated with various carbohydrate structures coated onto fluorescent beads, and binding was determined using the fluorescent bead adhesion assay. n=3 independent experiments. b. Lewis X is a potential microbicide that specifically inhibits the interaction of HIV-1 with DC-SIGN but not with Langerin. LCs, DCs, and Raji transfectants were incubated with HIV-1 gp120-coated beads and binding was measured using the fluorescent bead adhesion assay. The ability of various carbohydrate structures to inhibit HIV-1 binding to the cell lines was determined by pre-incubating the cells with medium (white bars), Lewis X (light grey bars), Lewis Y (black bars) or mannan (dark grey bars). Error bars represent the standard deviation of triplicates, and 1 representative experiment out of 3 is shown.
