# Supplementary material for: Langerin is a natural barrier to HIV-1 transmission by Langerhans cells
Source: Springer Nature journal article supplement (doi:10.1038/nm1541), 2007-03-01
Supplement: 41591_2007_BFnm1541_MOESM14_ESM.pdf [file 41591_2007_BFnm1541_MOESM14_ESM.pdf]

| Donor  | LCs      | Observation                                                                   |
|--------|----------|-------------------------------------------------------------------------------|
| #1-3   | immature | LCs inhibit T cell infection in a co-culture assay                            |
| #3-5   | immature | LCs do not transmit HIV-1; LCs transmit virus after mannan pre-treatment      |
| #6-10  | emigrant | LCs do not transmit HIV-1; LCs transmit virus after mannan/10E2 pre-treatment |
| #11-12 | emigrant | LC infection by HIV-1 is enhanced with mannan or 10E2                         |
| #13    | emigrant | LC-mediated HIV-1 transmission is independent of Langerin                     |
| #14-16 | immature | LCs do not transmit pseudotyped HIV-1 <sub>NL4.3 (X4)</sub>                   |

**Supplementary Table I: Summary of data obtained with different donors for LC isolation**
