# Supplementary material for: Langerin is a natural barrier to HIV-1 transmission by Langerhans cells
Source: Springer Nature journal article supplement (doi:10.1038/nm1541), 2007-03-01
Supplement: 41591_2007_BFnm1541_MOESM15_ESM.pdf [file 41591_2007_BFnm1541_MOESM15_ESM.pdf]

## Supplementary methods

**Antibodies, plasmid and reagents.** The following monoclonal antibodies were used: AZN-D1 and AZN-D2 (anti-DC-SIGN), DCGM4 (anti-Langerin, Beckman Coulter Inc., Miami, Florida, USA), OKT6 (anti-CD1a, IgG1), NA1/34 (anti-CD1a, IgG2a, Dako Cytomation Denmark, Glostrup, Denmark), HI149FITC (anti-CD1a, Pharmingen, San Diego, CA, USA), 2D7 (anti CCR-5, BD biosciences, Oxnard, CA, USA), goat anti-mouse IgG-PO (Jackson ImmunoResearch, West Grove, PA, USA), goat anti-mouseFITC (Zymed Laboratories Inc., South San Francisco, Ca. USA), HLA-DRPE, CD80PE, CD83PE, CD86PE (Immunotech, Marseille, France), D7230 (sheep anti-HIV-1- P24 polyclonal antibody, Aalto Bioreagents, Dublin, Ireland). Plasmid encoding the gp120-Fc from the JR-FL isolate was obtained from the NIH AIDS Research and reference Reagent Program. Human DC-SIGN and human Langerin were cloned into lentiviral vectors pLOX (LV-DC-SIGN and LV-lang), replacing the green fluorescent protein (GFP) marker gene, as previously described (Arrighi et al. 2004 J. Virol 78; 10848-55).

**Cell lines.** Raji cells expressing either wild type DC-SIGN or Langerin were generated by retroviral transduction with the respective lentiviral constructs (LV-DC-SIGN and LV-lang). Stable expression of the gene of interest was determined by flow cytometric analysis. The positive population, highly expressing the gene, was sorted on a cell sorter (Moflow; DakoCytomation) and thus, contains a mixture of clones. The CD34<sup>+</sup> human AML cell line MUTZ3 (Deutsche Sammlung von Mikroorganismen und Zellkulturen (DMSZ), Braunschweig, Germany) was maintained in (MEM)-Alpha medium containing ribonucleosides and deoxyribonucleosides (Life technologies, Paisley, United Kingdom) supplemented with 20% FCS, 0.01mM 2-mercaptoethanol (Merck, Darmstadt, Germany) and 10% of culture supernatant of the 5637 cell line (American Type Culture collection [ATCC], Manassa, VA)<sup>17</sup>. A LC phenotype was induced as previously described. In short, the cells were seeded in 12 well plates (Costar, Cambridge, MA, USA) at a concentration of  $0.1 \times 10^6$ /ml and stimulated with GM-CSF 800 U/ml, recombinant human TGF-beta-1 (5ng/ml, Biovision, Mountain View, CA, USA) and recombinant TNF- $\alpha$  (2.5 ng/ml, Strathmann biotec, Hamburg, Germany) and restimulated at day 4 and 7.

**Primary cells.** Monocyte derived immature DCs were cultured as described before<sup>2</sup>. In short, human blood monocytes were isolated from buffy coats by a Ficoll gradient and a subsequent CD14-selection step using CD14 labeled Immunomagnetic Microbeads (MACS system; Miltenyi Biotec. Bergisch, Gladbach, Germany).

Purified monocytes were differentiated into immature DCs in the presence of IL-4 and GM-CSF (700 and 400 U/ml, respectively; Biosources, Nivelles, Belgium).

**Virus.** HIV-1 stocks were generated by the passage of viruses through CD4<sup>+</sup> lymphocytes, isolated from individuals who did not carry the  $\Delta 32$  CCR5 allele (CCR5<sup>+/+</sup>), screened for by standard polymerase chain reaction technique. All viral stocks were assayed for tissue culture infectious dose (TCID<sub>50</sub>) on CD4<sup>+</sup>-enriched lymphocytes. CD4<sup>+</sup>-enriched lymphocytes were plated at  $2 \times 10^5$  cells/well in 96-well plates with 5-fold serial dilutions of the virus. The cells were fed on day 7 with fresh media and scored on day 14 for p24 levels, with the number of positive wells being used to identify the TCID<sub>50</sub> value for each virus. A subtype B molecular cloned virus JR-CSF (R5) was used in the experiments.

**Fluorescent bead adhesion assay.** The fluorescent bead adhesion assay was performed as described before<sup>2</sup>. In short, streptavidin was covalently coupled to the carboxylate-modified TransFluorSpheres (488/645 nm, 1.0  $\mu$ m; Molecular Probes, Eugene, OR, USA). The streptavidin-coated beads were incubated with a biotinylated F(ab')<sub>2</sub> fragment goat anti-human (6  $\mu$ g/ml; Jackson Immunoresearch), followed by an overnight incubation with gp120-Fc at a concentration of 10  $\mu$ g/ml at 4°C<sup>2</sup>. The adhesion assay was performed as follows: 50,000 cells were incubated with beads for 45 min at 37 °C. To determine specificity of adhesion, cells were pre-treated with mannan (1 mg/ml), EGTA (10 mM), blocking antibodies against DC-SIGN (20  $\mu$ g/ml) fucose or mannose (50mM) for 15 min at 37 °C. Binding was measured by FACS analysis.

**Immunofluorescence microscopy.** Cryosections of healthy tissues (7 $\mu$ ) were fixed with 100% acetone and stained with primary antibodies (10  $\mu$ g/ml) for 1 h at 37 °C. Sections were counterstained with isotype-specific Alexa488- or Alexa594-labeled anti-mouse antibodies (Molecular probes, Eugene, OR). Nuclei were stained with DAPI (Molecular Probes, Eugene, OR, USA). Epidermal sheets were cut into pieces of 1 cm<sup>2</sup> and stained in 500  $\mu$ l PBS in a 24 well plate. Sheets were counterstained with a mouse-specific Alexa594 anti-mouse antibody and spread out on glass slides for microscopy.

**Electron Microscopy.** Migratory LCs or MUTZ3/LCs ( $2 \times 10^6$ ) were incubated with 1 $\mu$ g of HIV-1 (JR-CSF) for 4 h. Cells were fixed in 2% paraformaldehyde and 0.2% glutaraldehyde in 0.1 phosphate buffer for 2 h at room temperature. Cells were pelleted in 12% gelatine, cryoprotected in 2.3M sucrose and snap-frozen in liquid nitrogen. Ultrathin cryosections were double immunolabeled with sheep polyclonal antibody P24 (15nm protein

A goldlabel) and DCGM4 (anti-Langerin) antibody (10nm protein A goldlabel). After incubation, the sections were stained with uranylacetate and embedded in methylcellulose. Sections were examined with a transmission electron microscope (model Philips CM100 Bio Twin).

**Flowcytometry.** For determining cell surface expression, cells were incubated with primary antibody (5 µg/ml) at 4 °C, followed by staining with a secondary FITC-labeled anti-mouse antibody (Zymed, San Francisco, CA) and analyzed on FACS calibur (BD Pharmingen, San Diego, CA, USA).
